# Supplementary material for: Identification of Tumor Microenvironment Scoring Scheme Based on Bioinformatics Analysis of Immune Cell Infiltration Pattern of Ovarian Cancer
Source: J Oncol. 2022 Aug 30;2022:7745675. doi: 10.1155/2022/7745675 (PMC9448528; doi:10.1155/2022/7745675)
Supplement: Supplementary Materials — Figure S1: The flow chart of this study. Figure S2: Relationship between LM22 signature in TCGA and GEO datasets and prognosis. Figure S3: Consensus clustering of combined ovarian cancer samples. A-D: Consensus matrix at k = 2–5. E: CDF curves under different k values. F: The area under the CDF curve under different k values. Figure S4: The optimal number of clusters was determined according to cophenetic, dispersion, evar, residuals, rss, silhouette and sparseness. Figure S5: Consensus matrix heatmap with clustering number 2–10 respectively. Figure S6: GO and KEGG enrichment analysis for (A) Signature C1 and (B) Signature C4. Figure S7: Importance evaluation of 102 DEGs A: Random forest plot of ntree = 100. B: Distribution of 102 DEGs in GeneC. C: Order of importance of 102 DEGs. Figure S8: K-means classification based on 102 genes. A: 102 DEGs were divided into 4 categories according to the TPM expression level of 102 genes by k-means algorithm. B: The number of genes contained in each signature G1. Figure S9: The expression levels of immunoactivated genes in TMEC group, GeneC group and TMEscore group, respectively. Figure S10: The expression levels of immune checkpoint genes in TMEC group, GeneC group and TMEscore group, respectively. Figure S11: The expression levels difference of genes in TGF/EMT pathway in TMEC group, GeneC group and TME score group, respectively. [file 7745675.f1.zip]

Archive with 13 entries (13 files):
- Figure S1.pdf
- Figure S10.pdf
- Figure S11.pdf
- Figure S2.pdf
- Figure S3 (1).pdf
- Figure S4.pdf
- Figure S5.pdf
- Figure S6.pdf
- Figure S7 (1).pdf
- Figure S8 (1).pdf
- Figure S9 (1).pdf
- Supplementary Table  2.docx
- Supplementary Table 1.docx
