# Supplementary figures and images for: Identification of Tumor Microenvironment Scoring Scheme Based on Bioinformatics Analysis of Immune Cell Infiltration Pattern of Ovarian Cancer
Source: Hindawi journal article supplement (doi:10.1155/2022/7745675), 2022-08-30

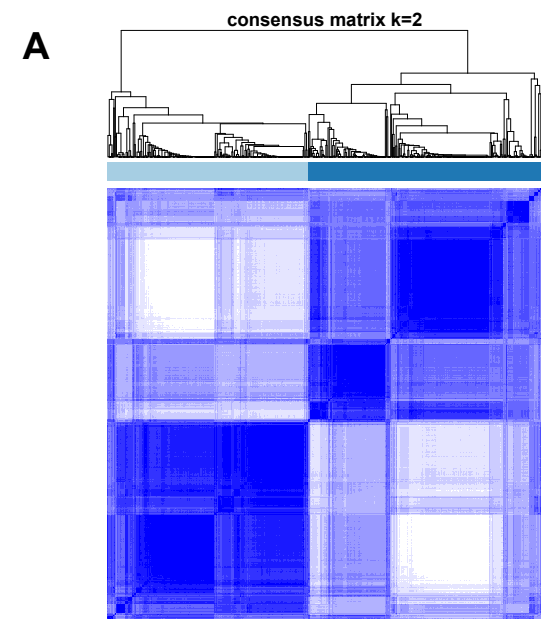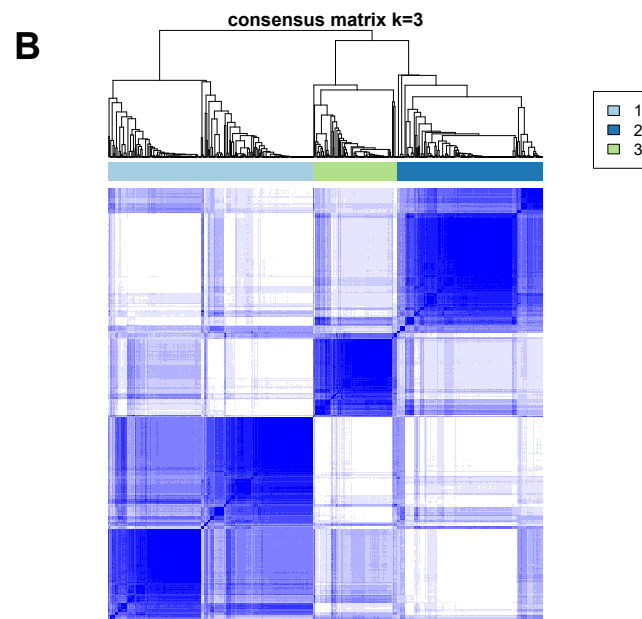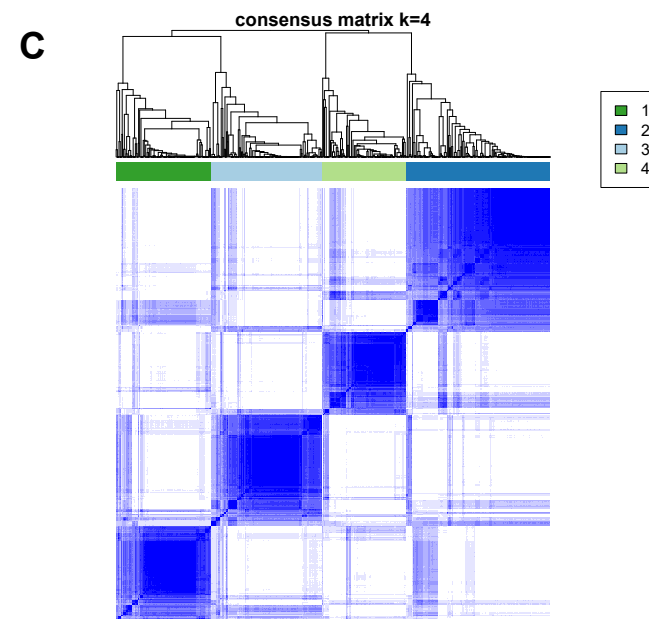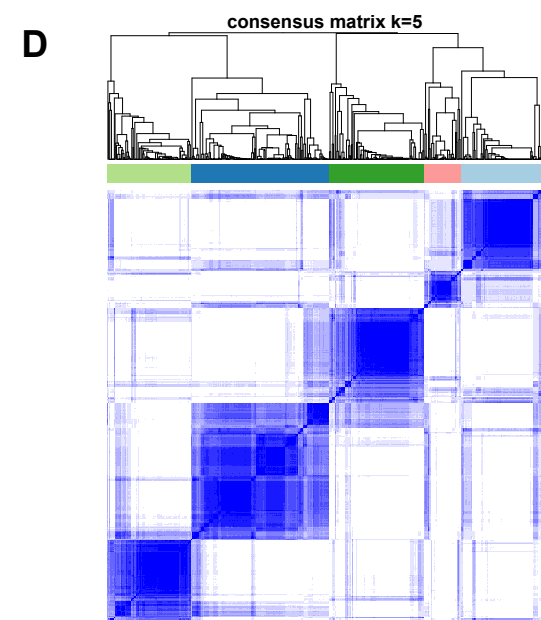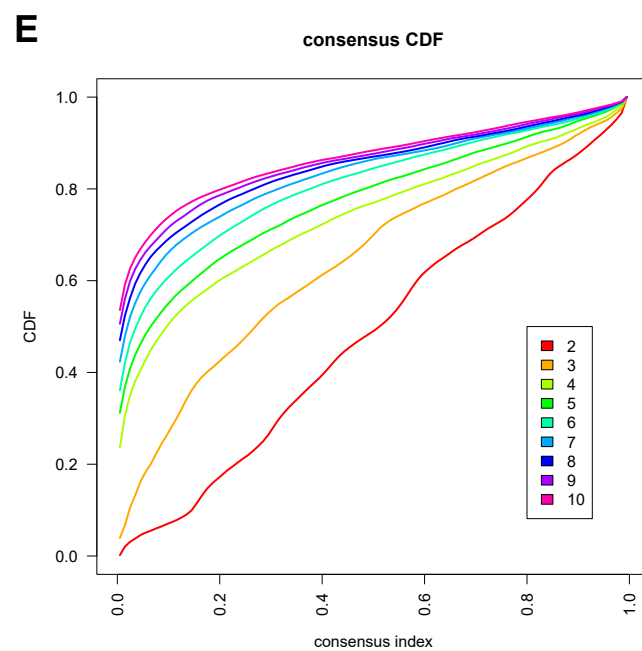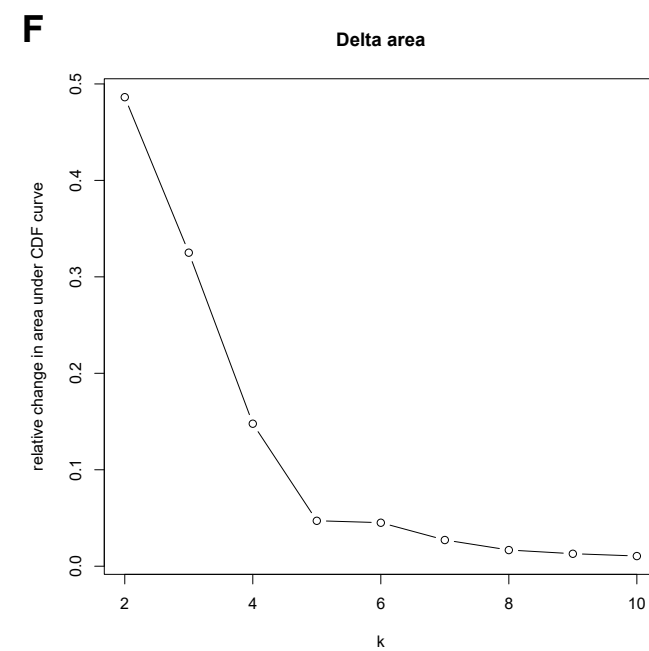

Supplement: f1 [file 7745675.f1.zip]

A

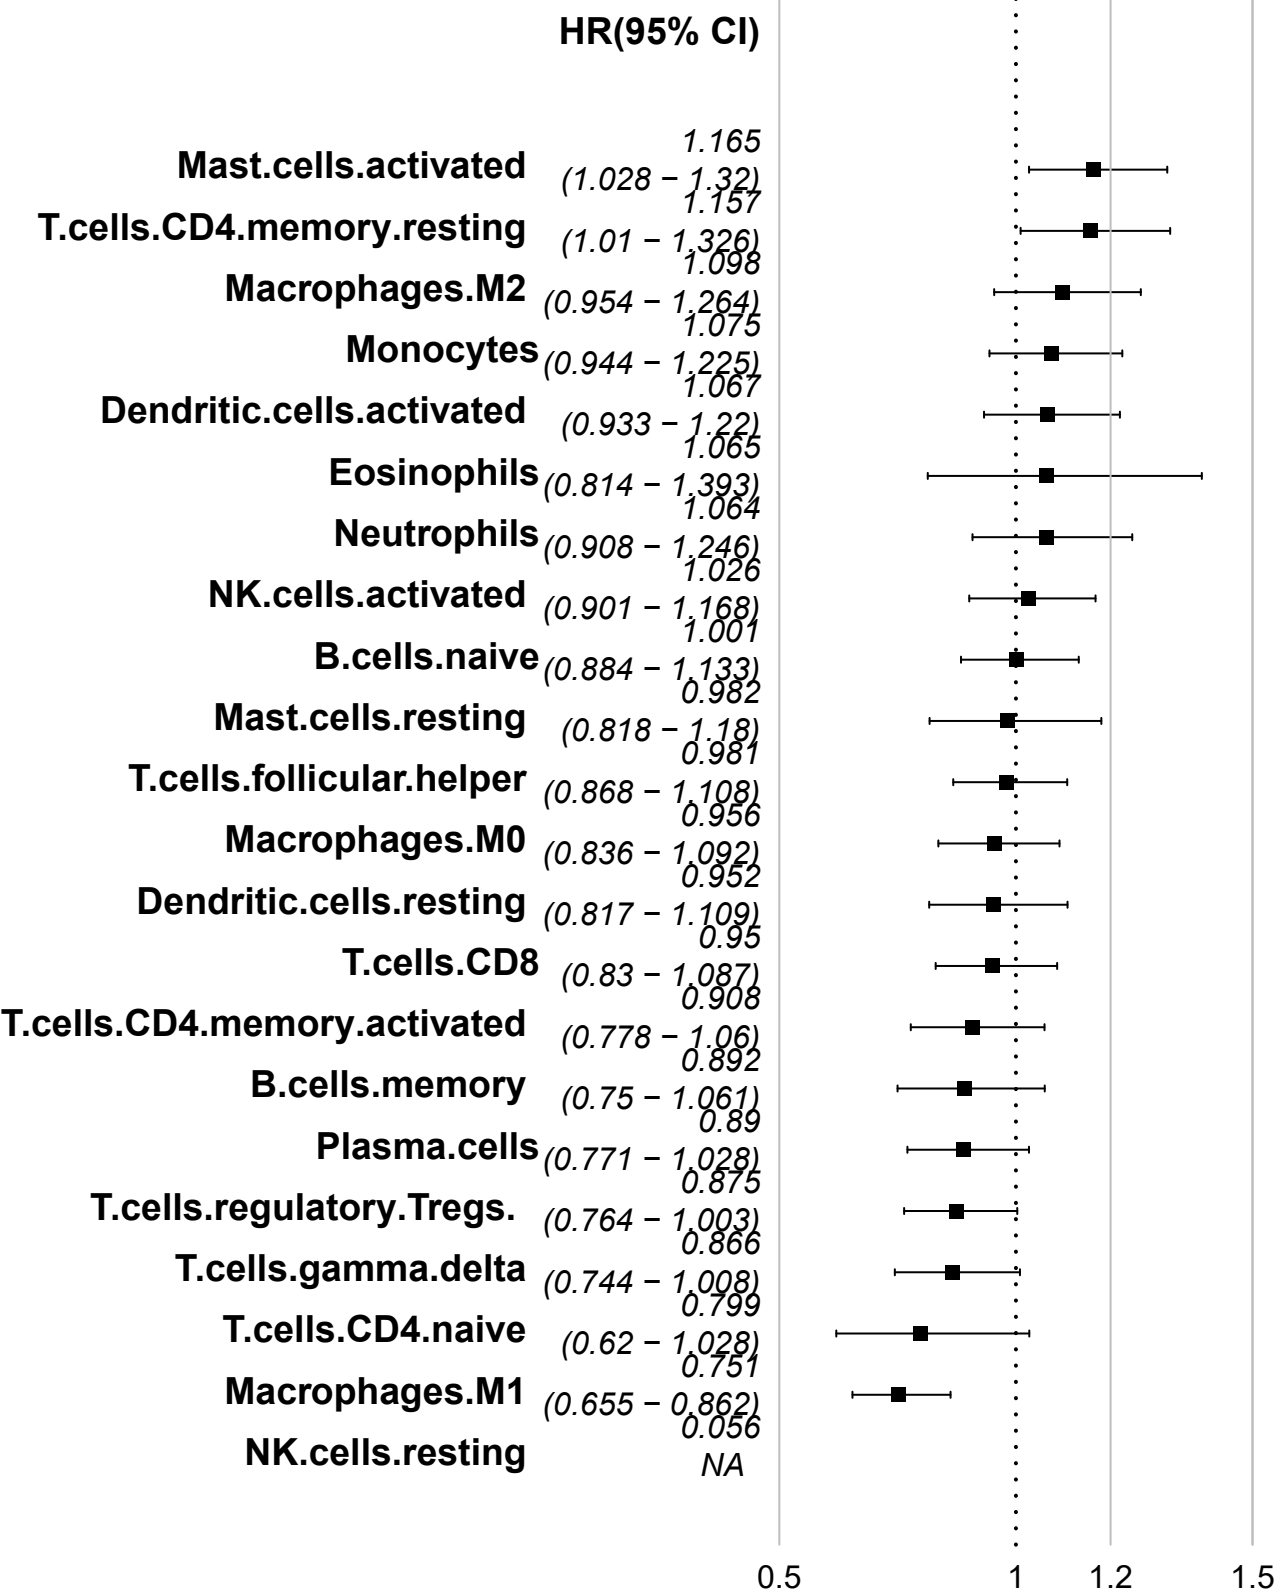

TCGA

B

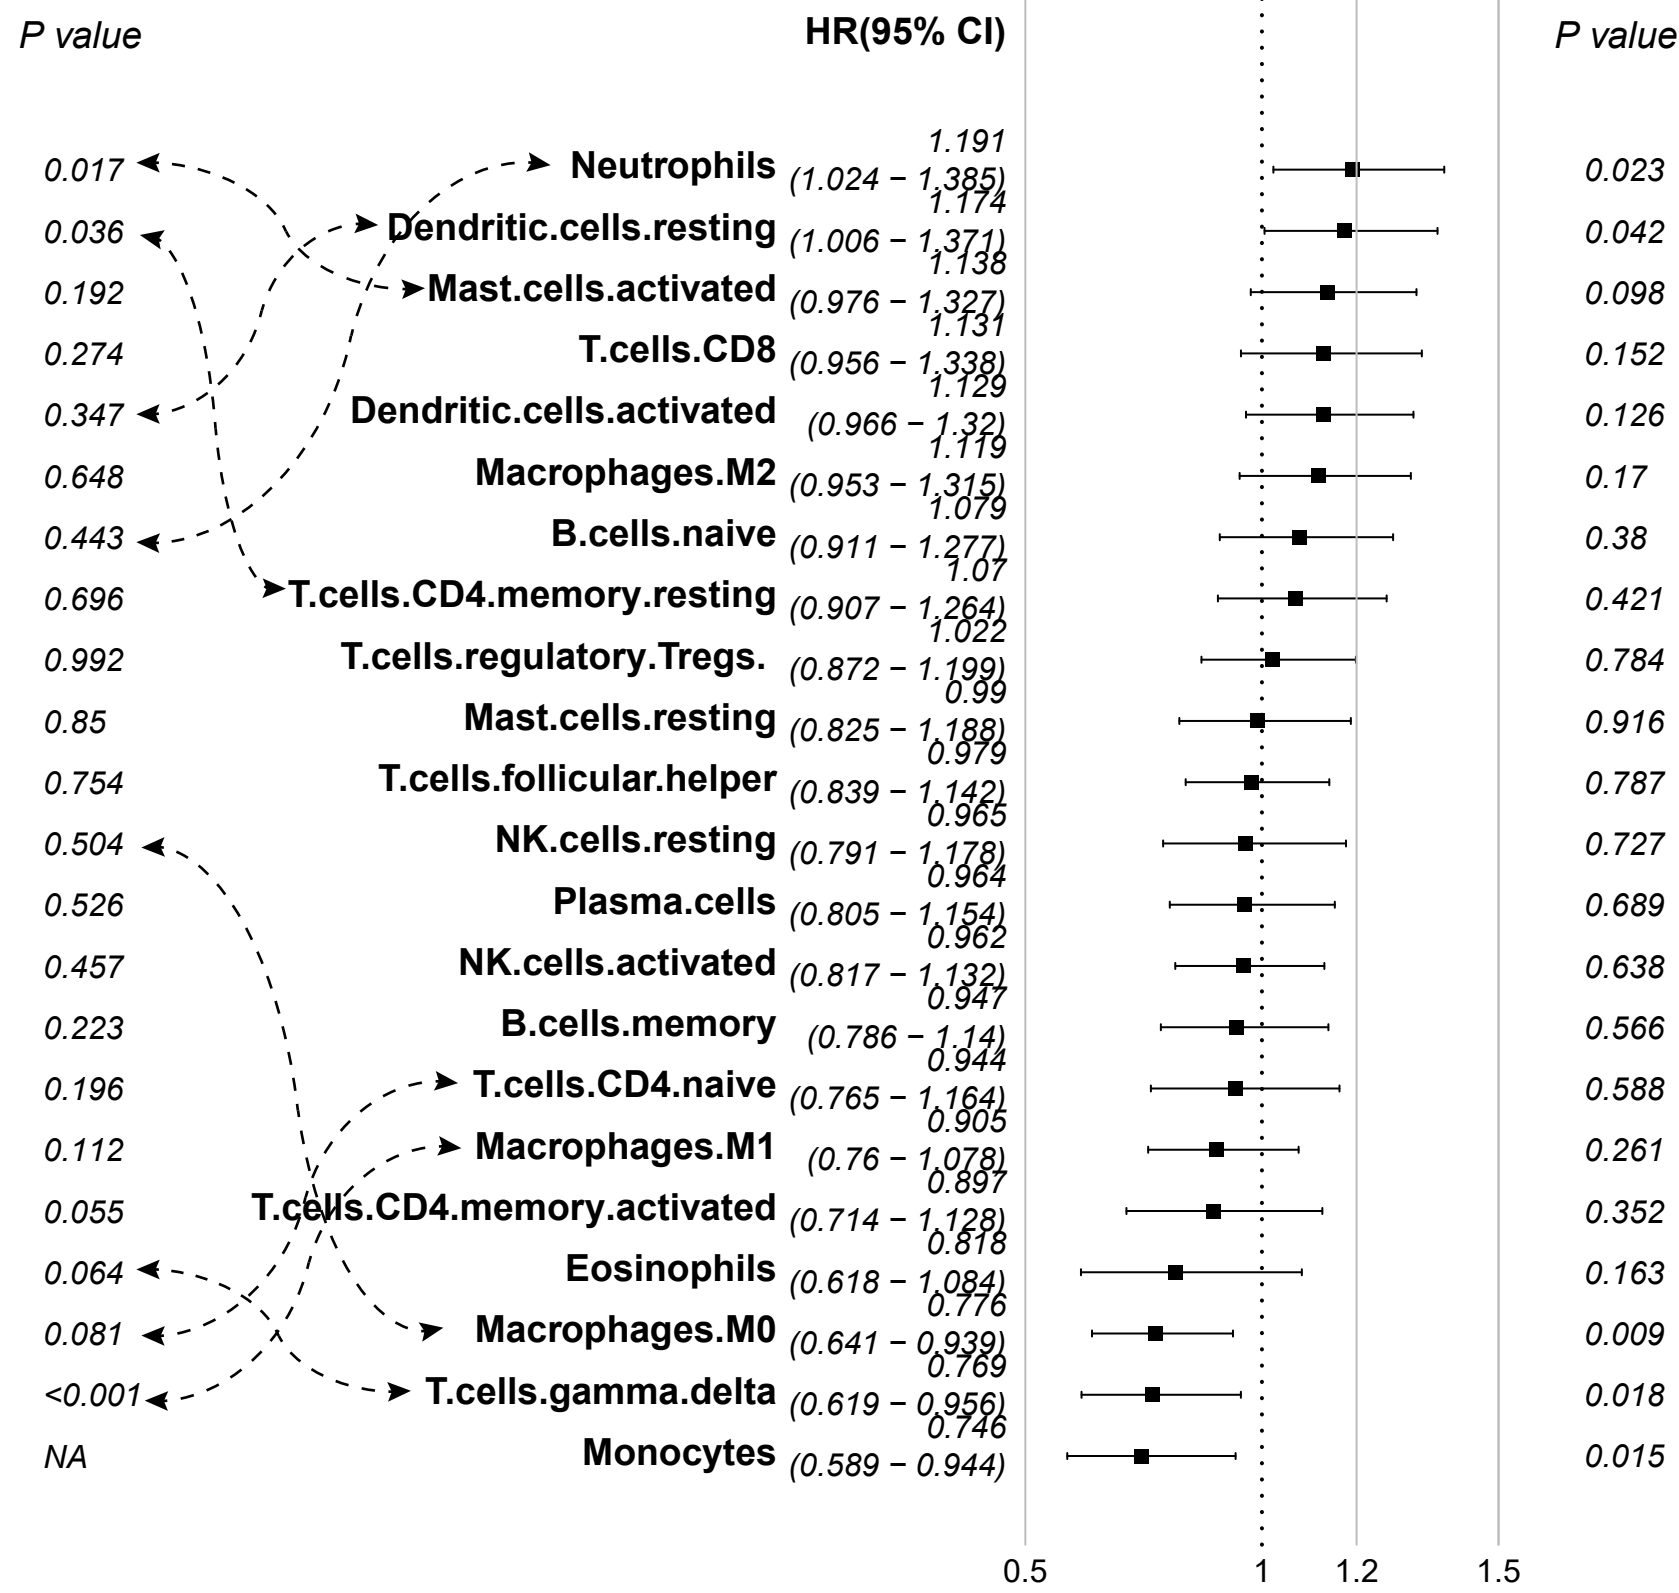

GEO

Supplement: f1 [file 7745675.f1.zip]

# NMF rank survey

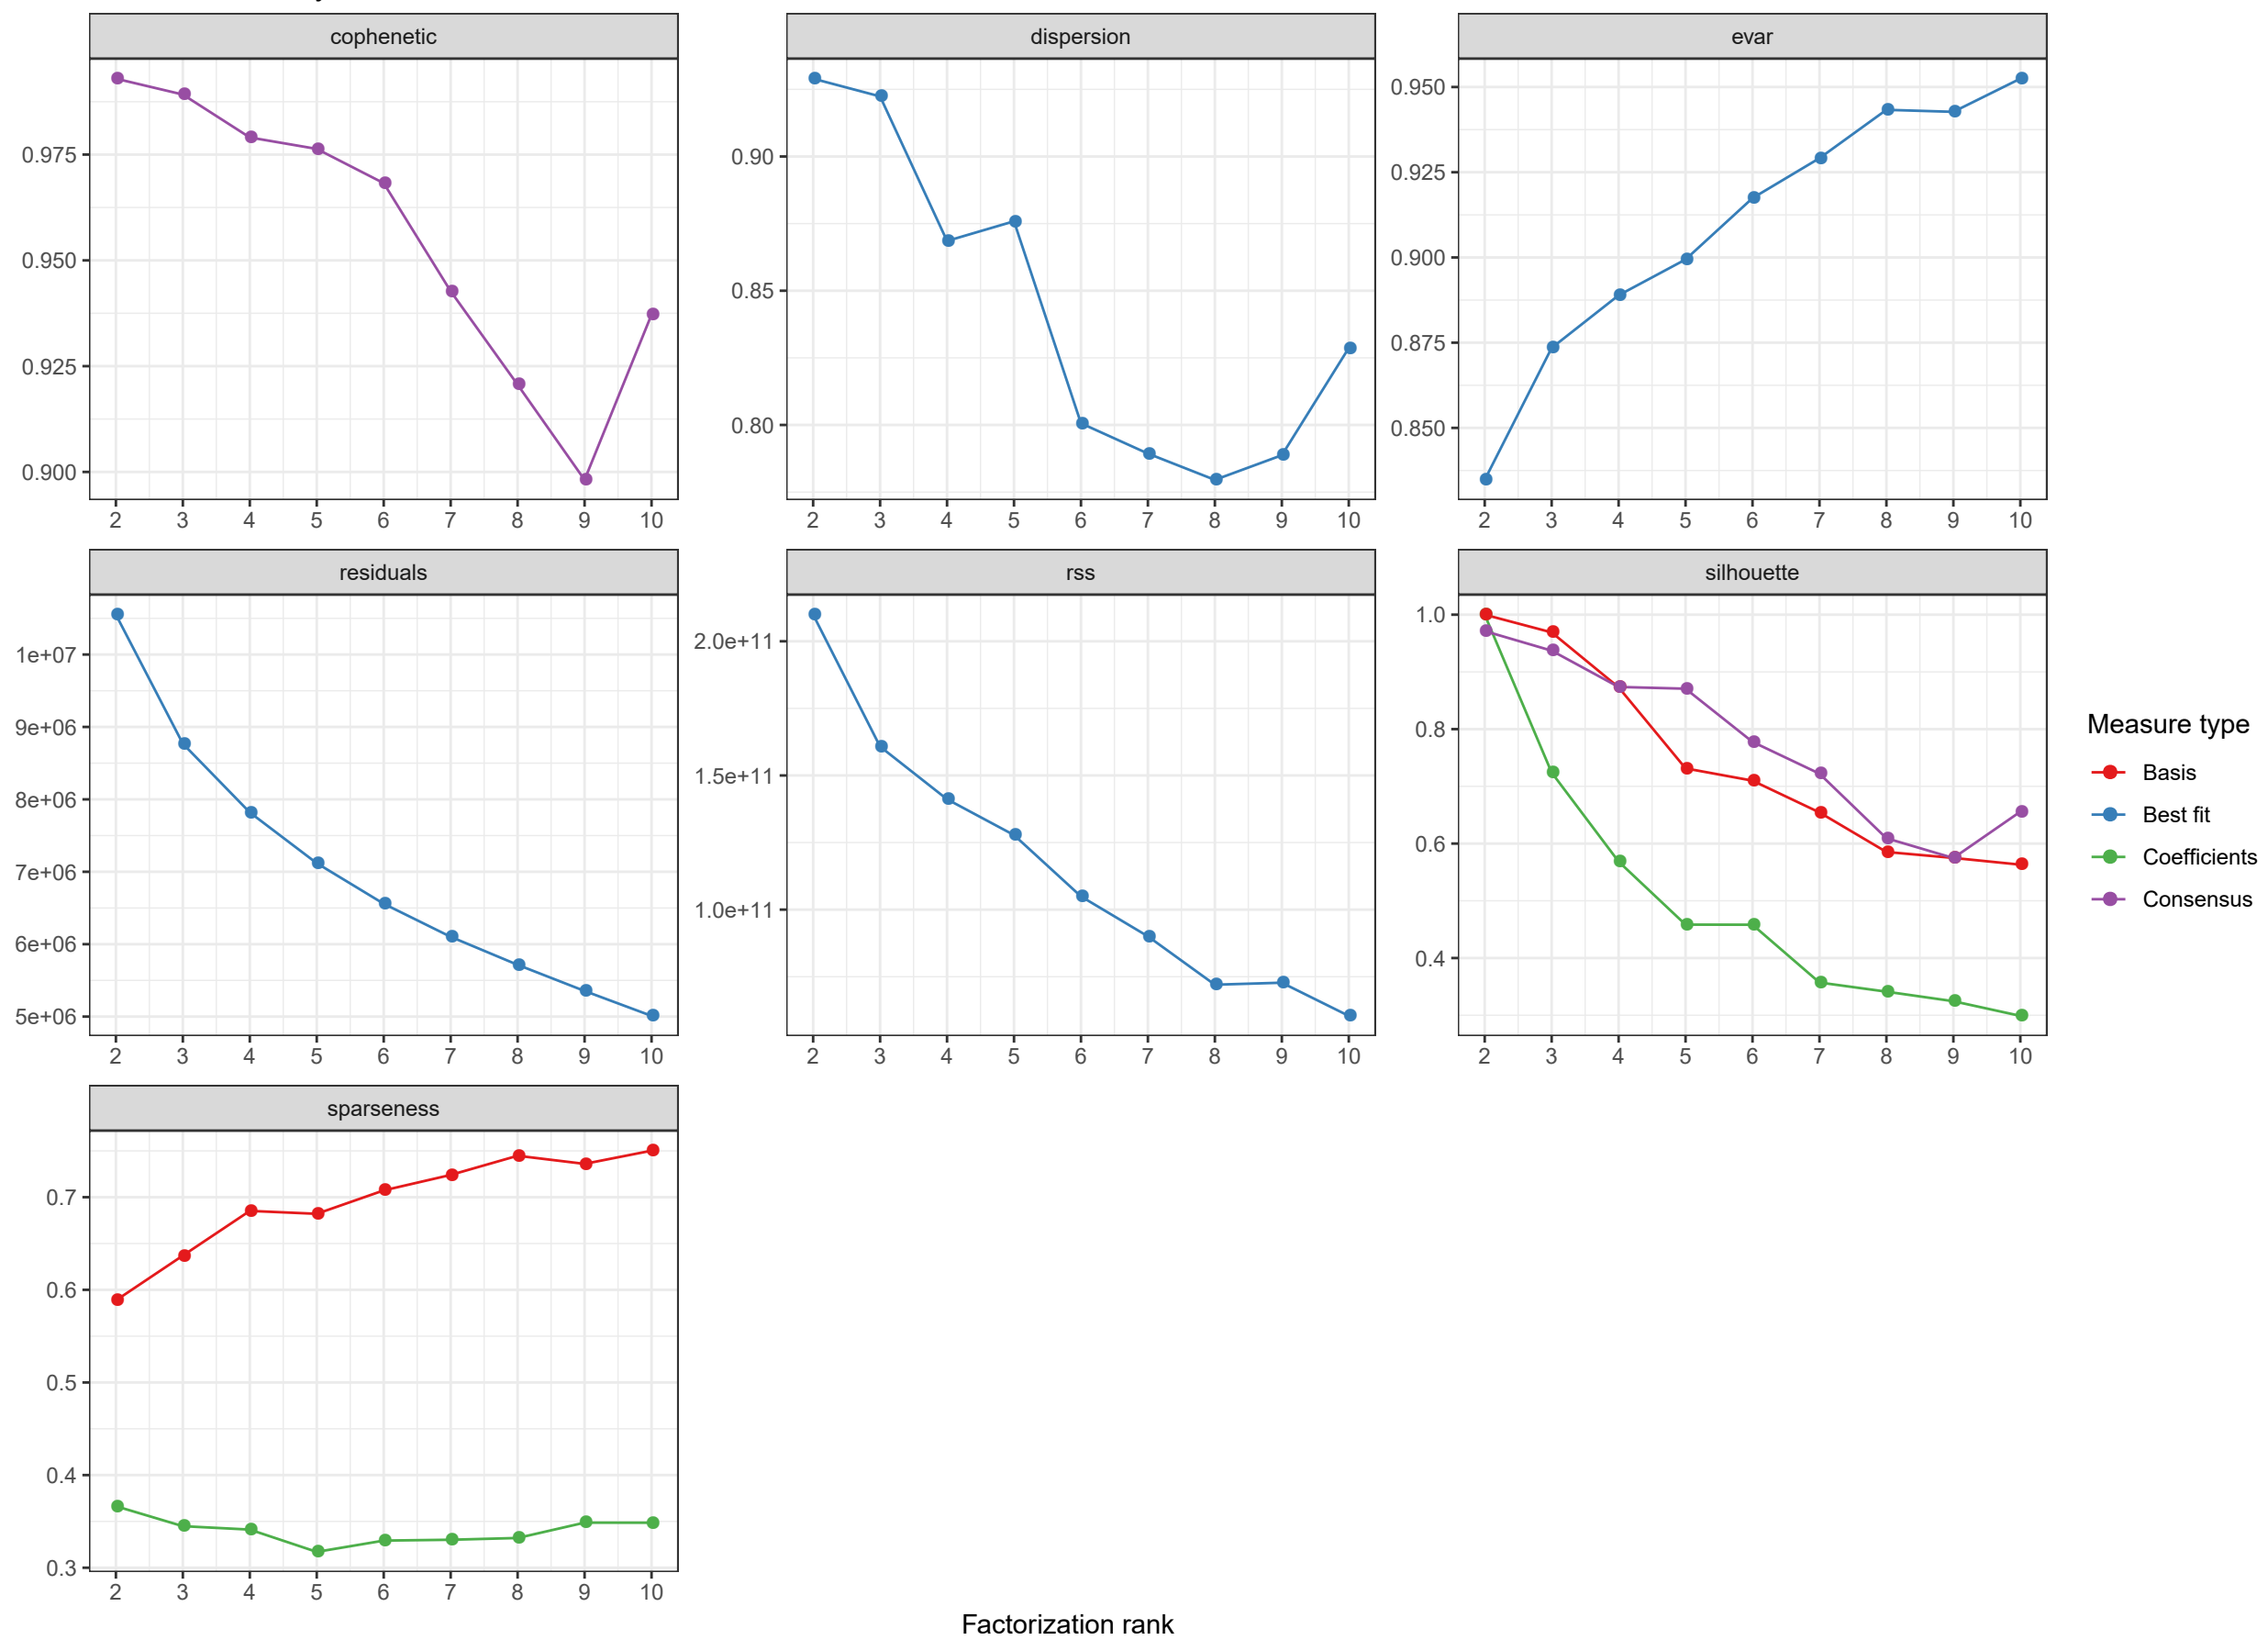

Supplement: f1 [file 7745675.f1.zip]

rank = 2

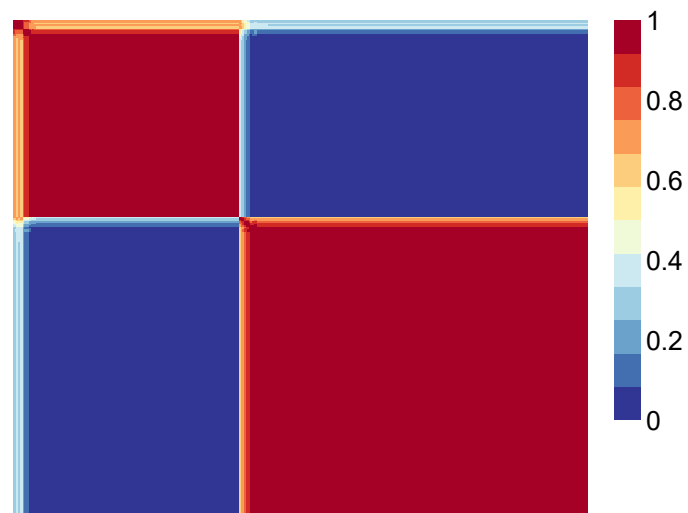

rank = 3

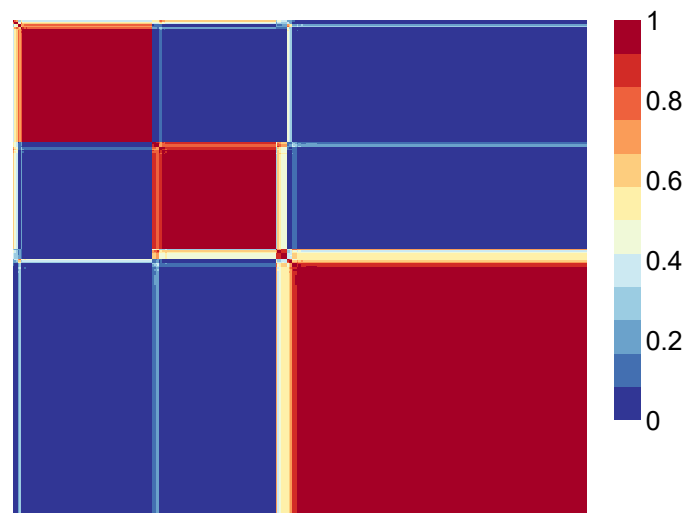

rank = 4

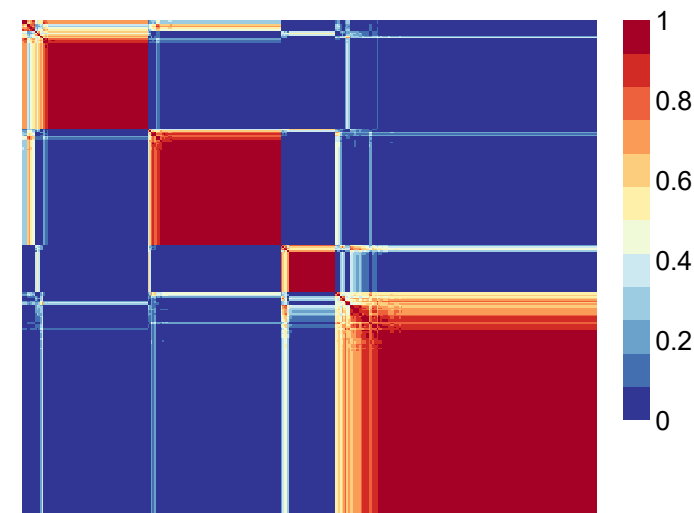

rank = 5

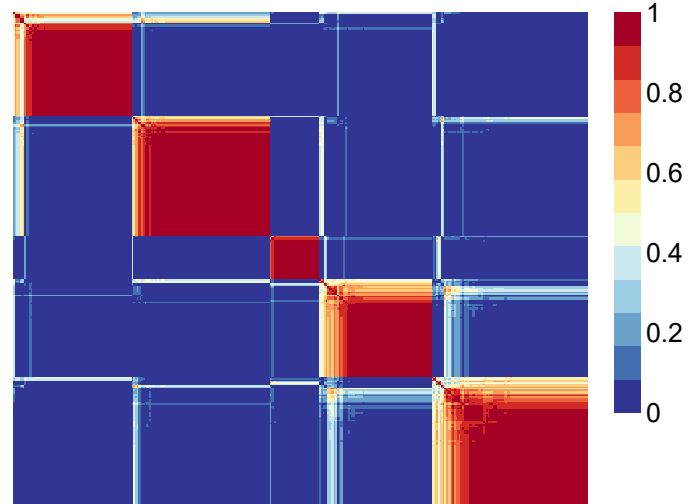

rank = 6

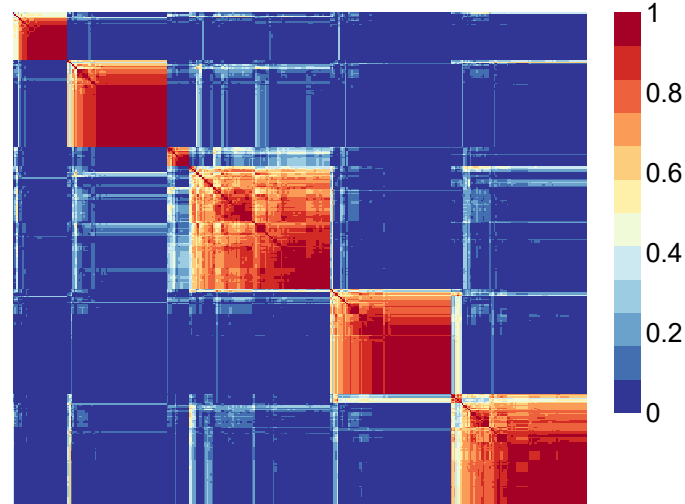

rank = 7

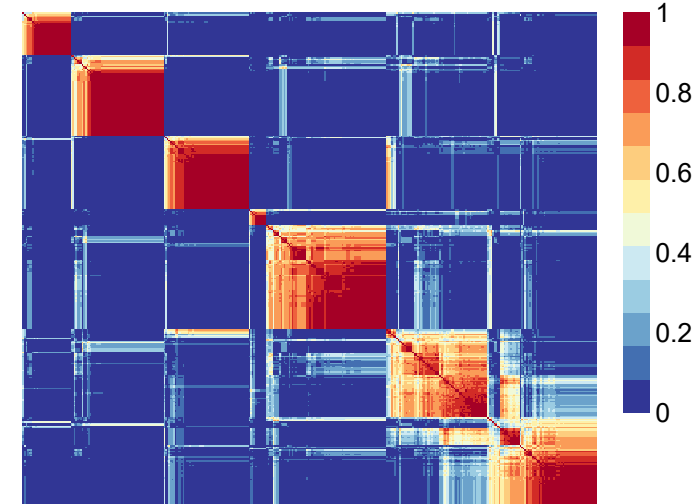

rank = 8

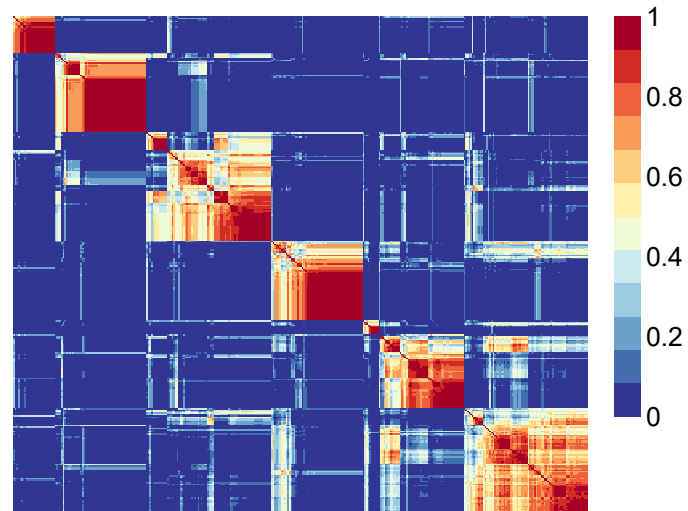

rank = 9

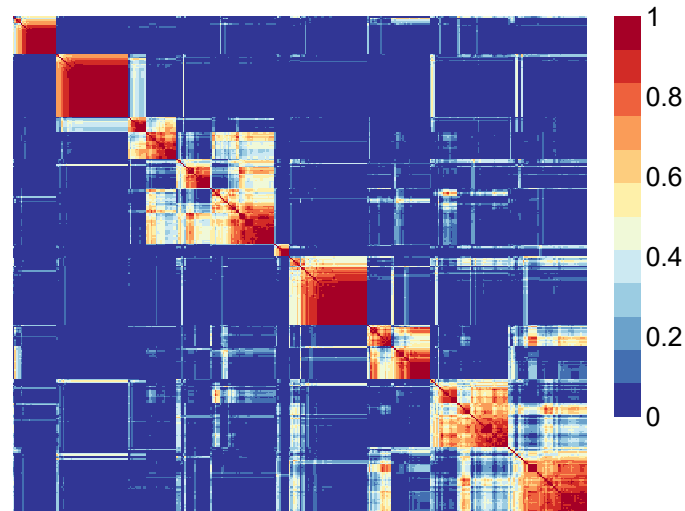

rank = 10

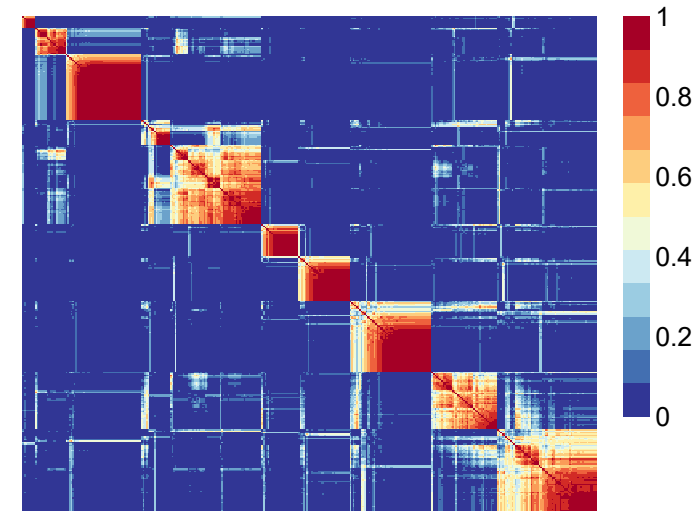

Supplement: f1 [file 7745675.f1.zip]

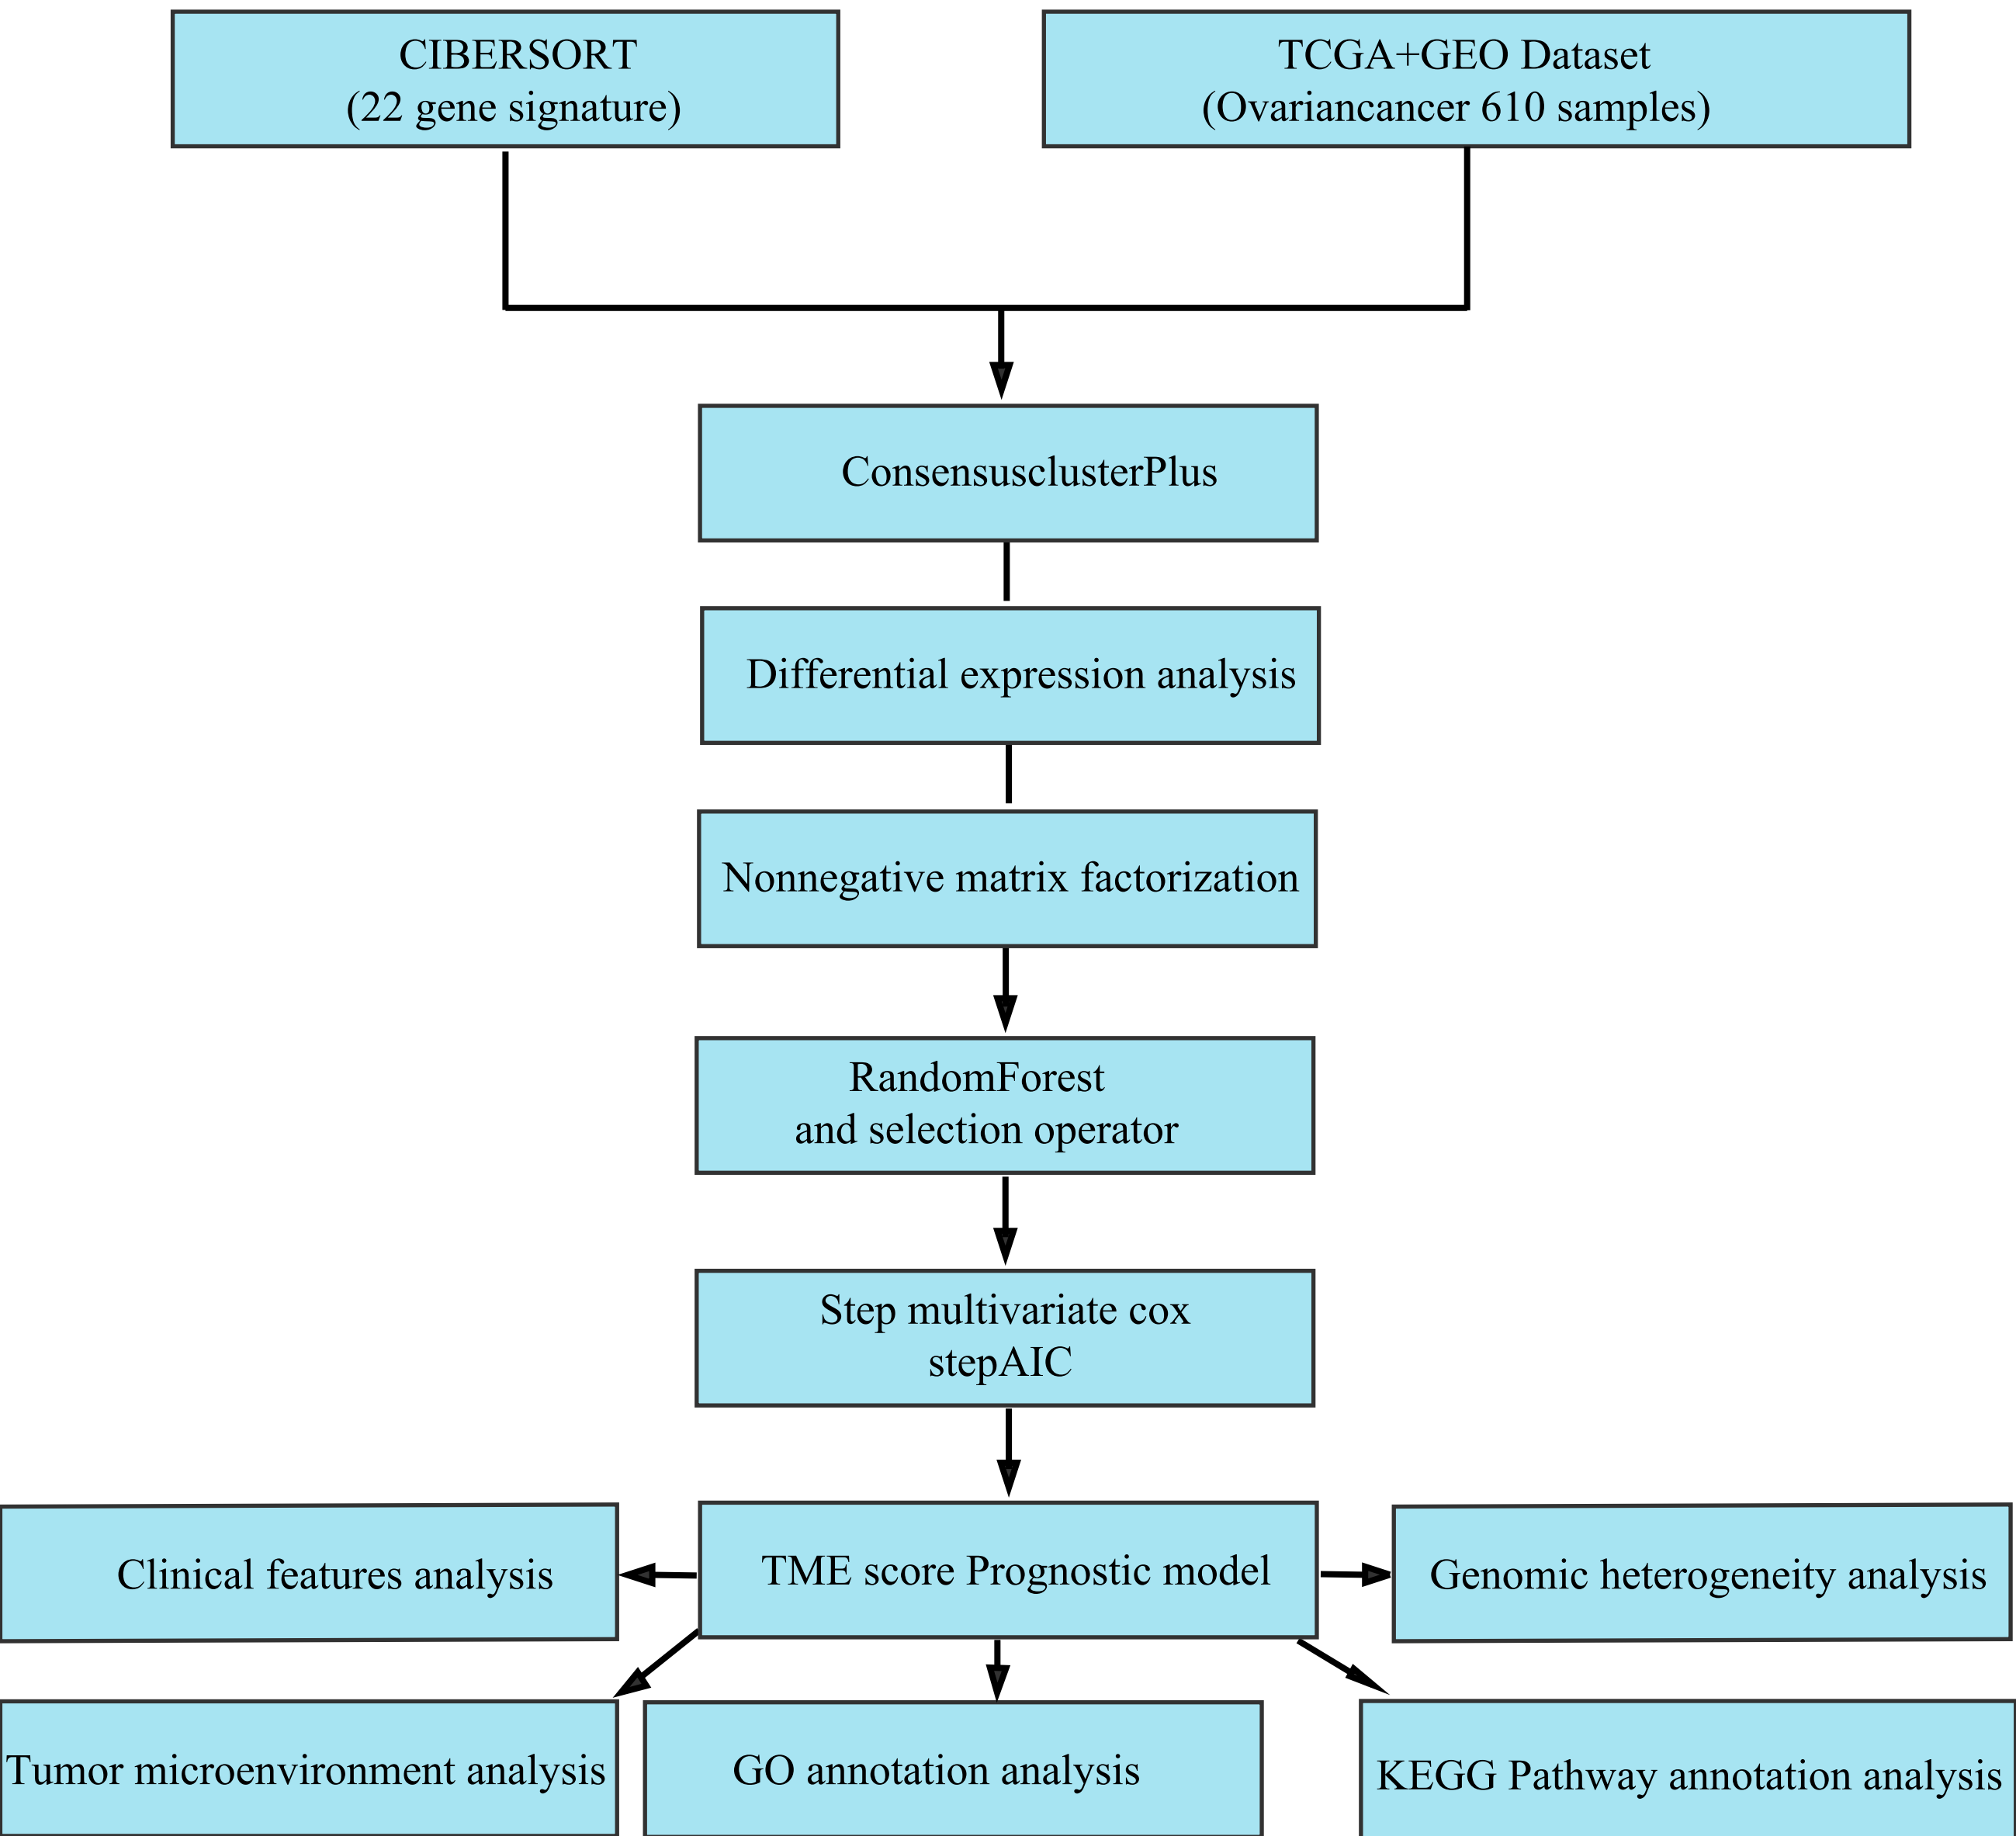

Supplement: f1 [file 7745675.f1.zip]

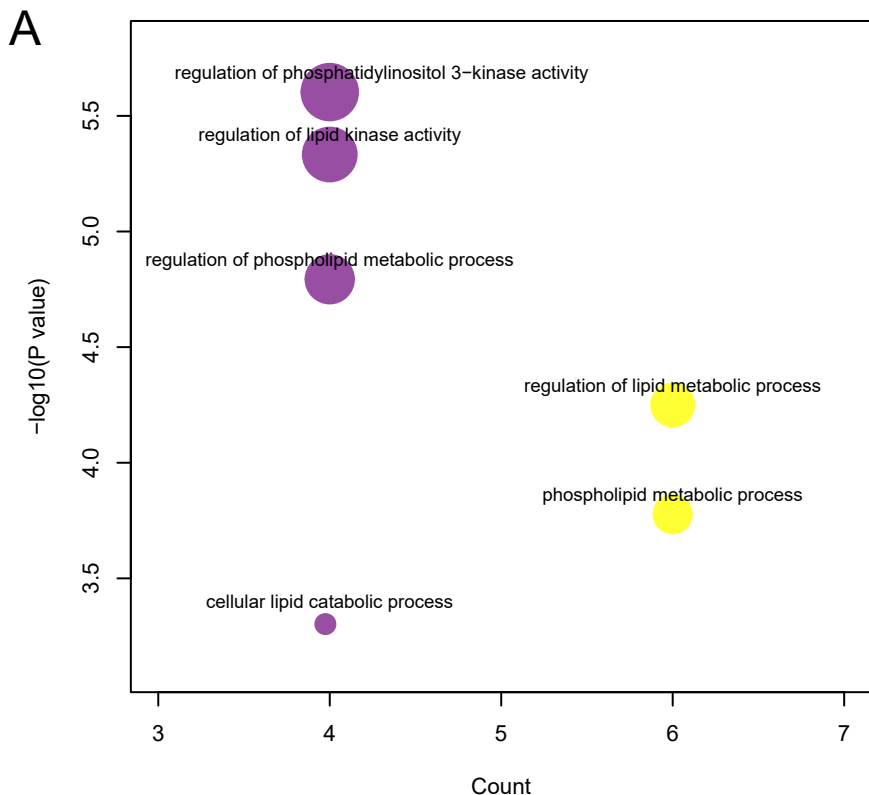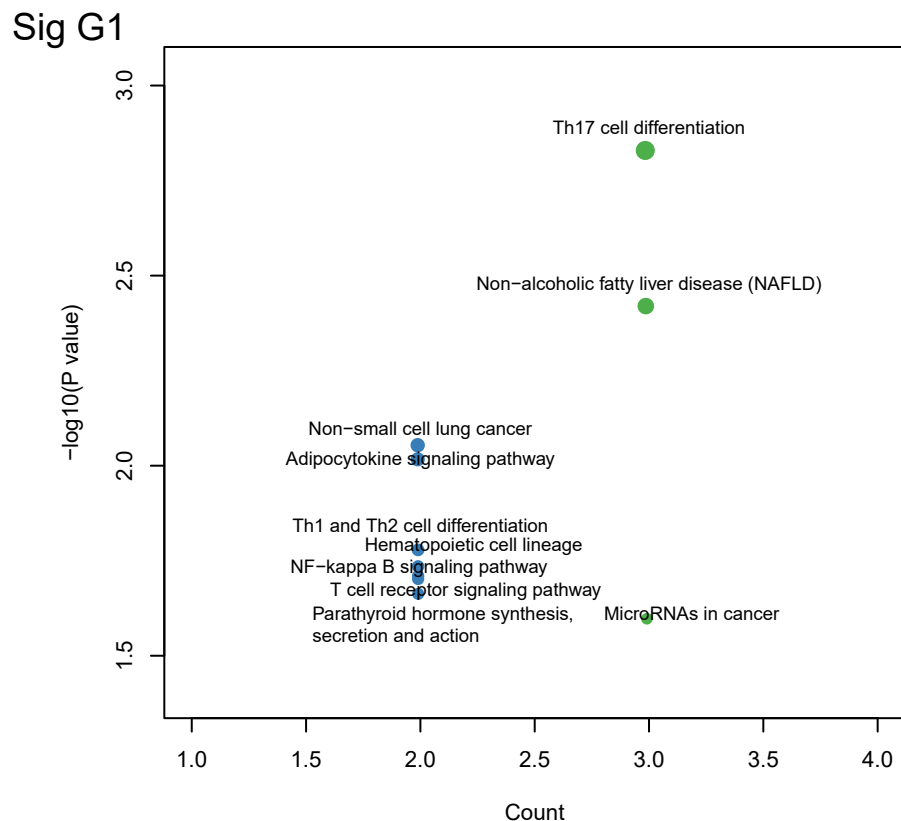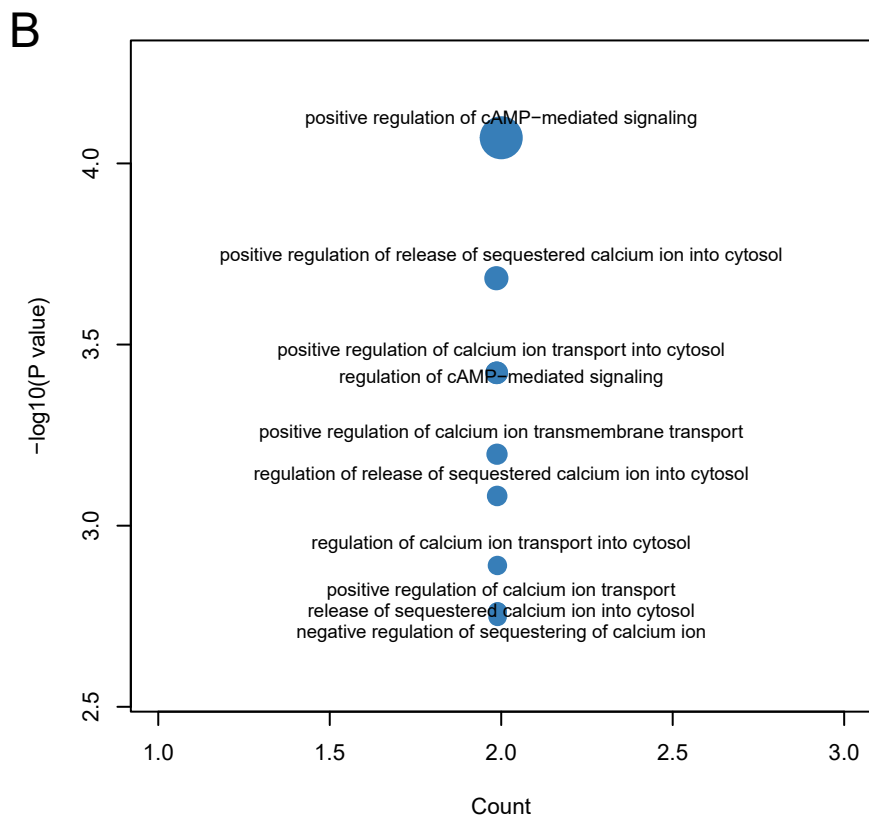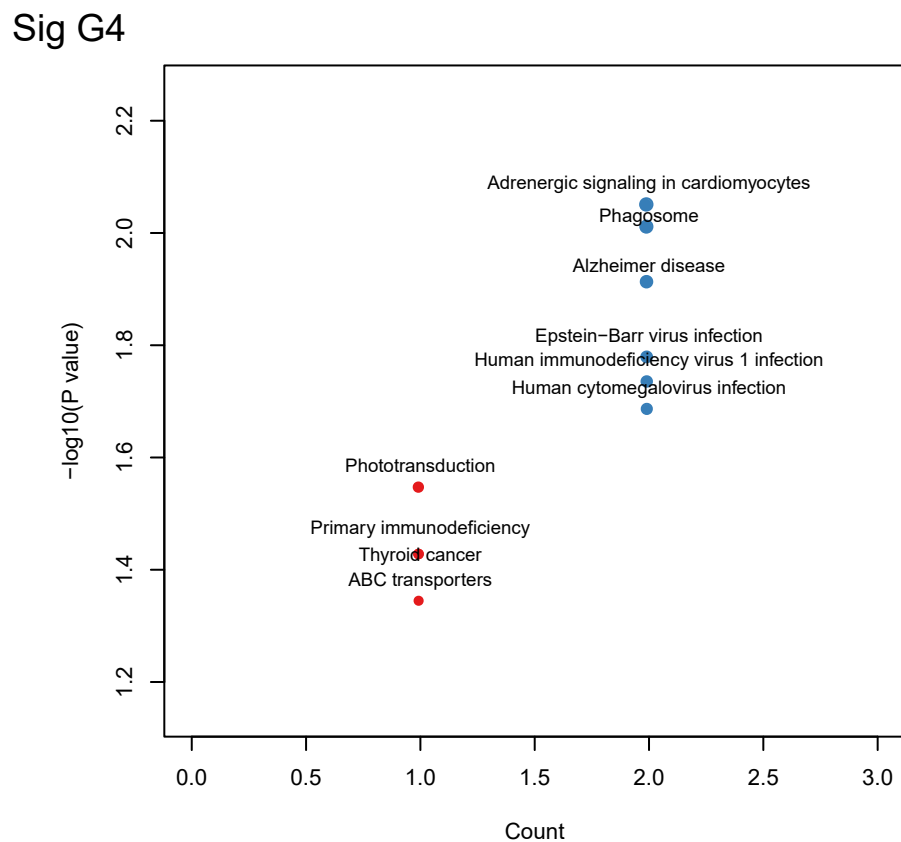

Supplement: f1 [file 7745675.f1.zip]

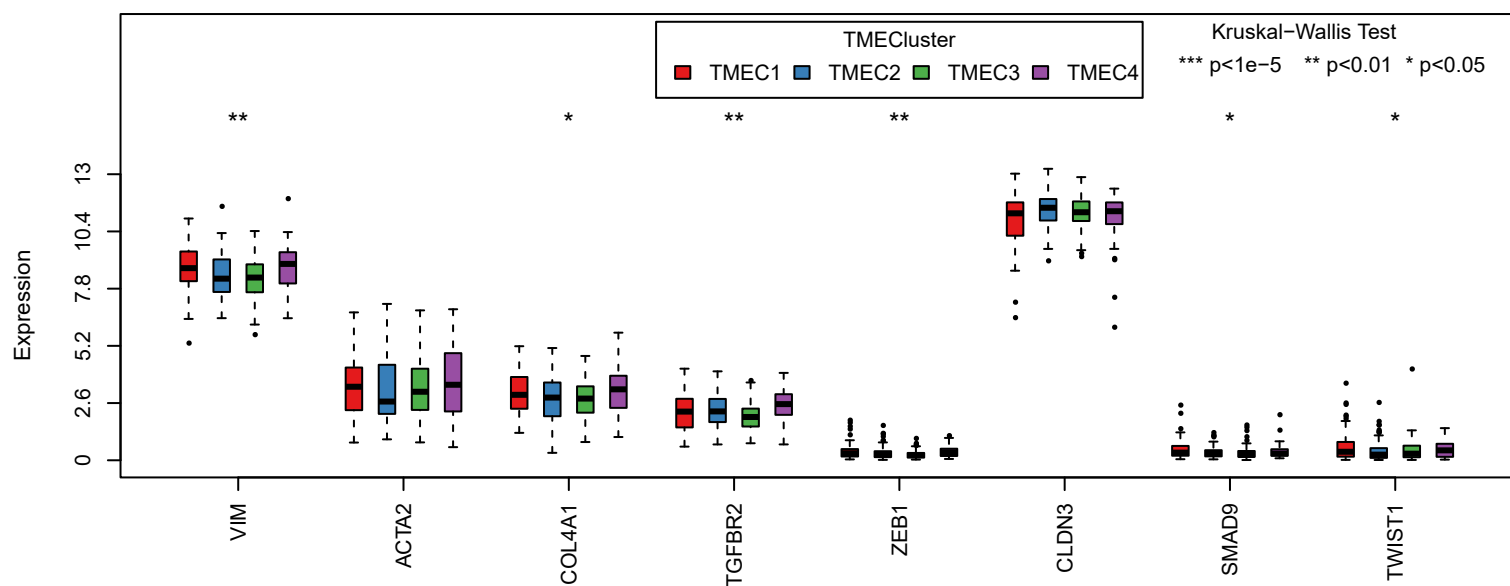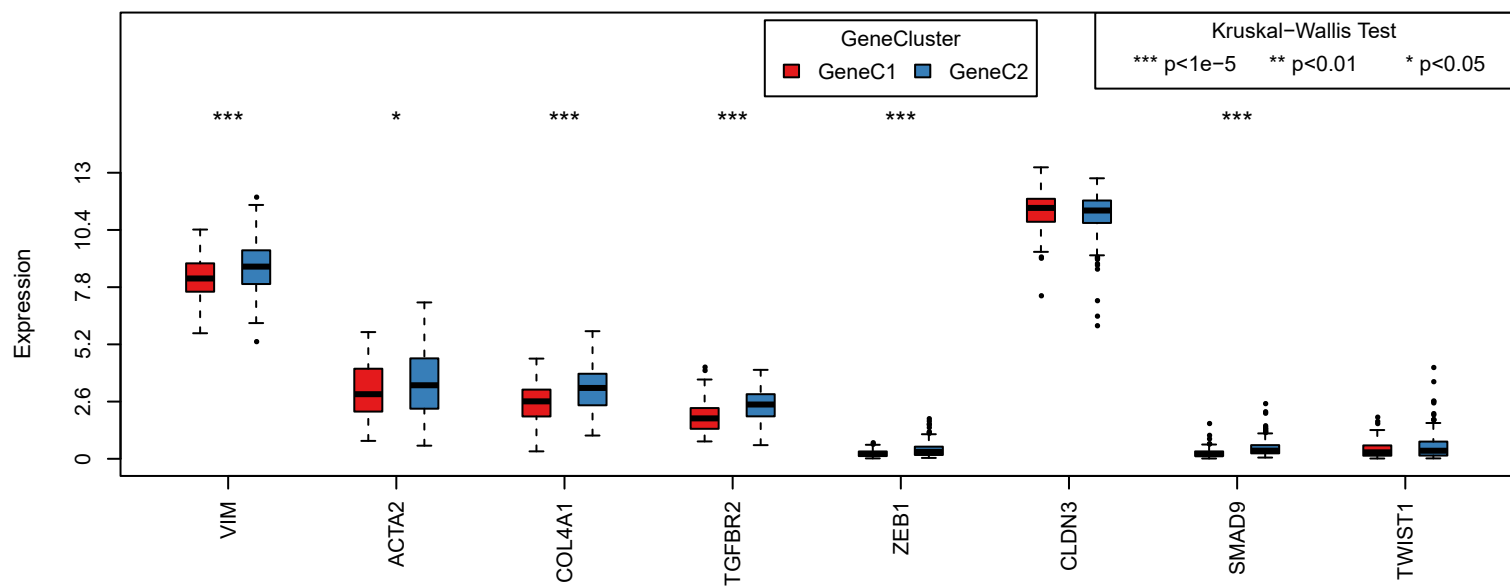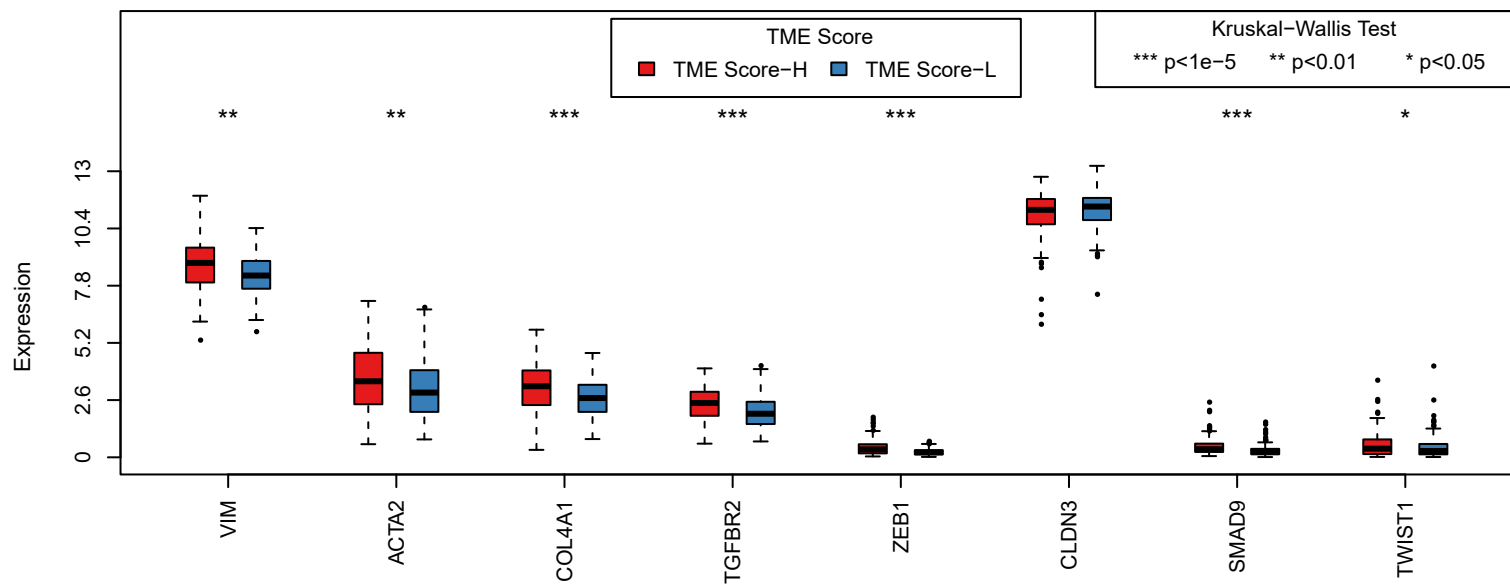

Supplement: f1 [file 7745675.f1.zip]

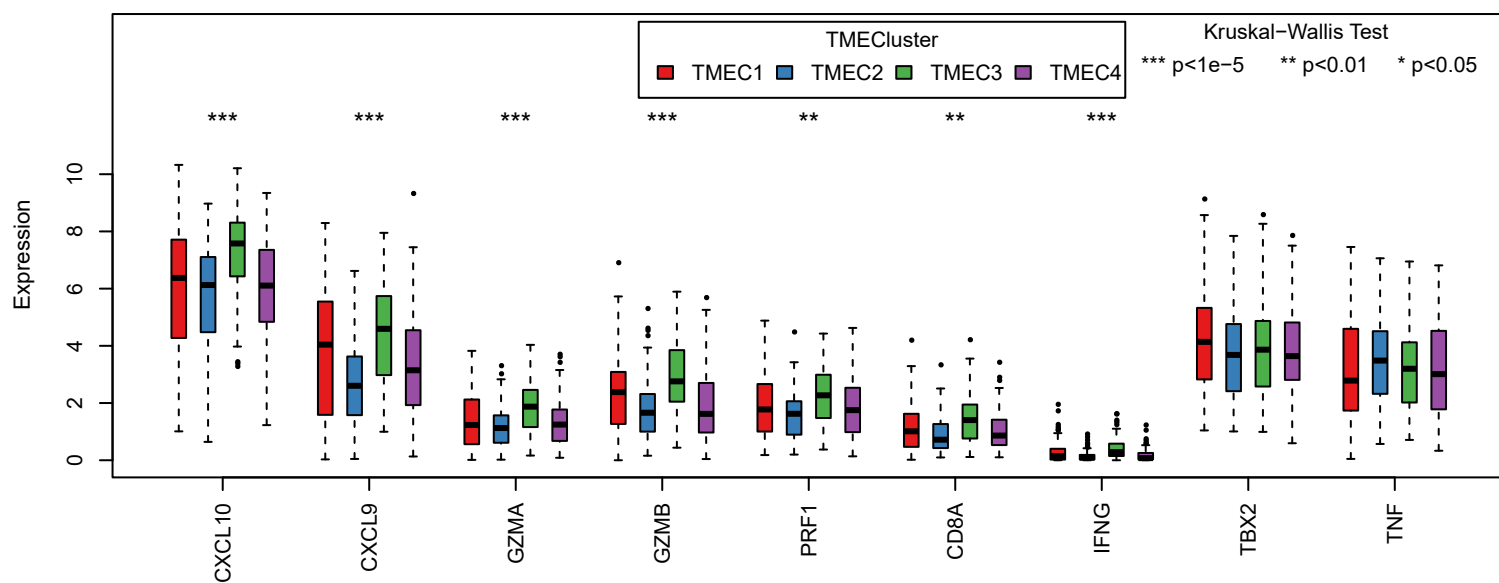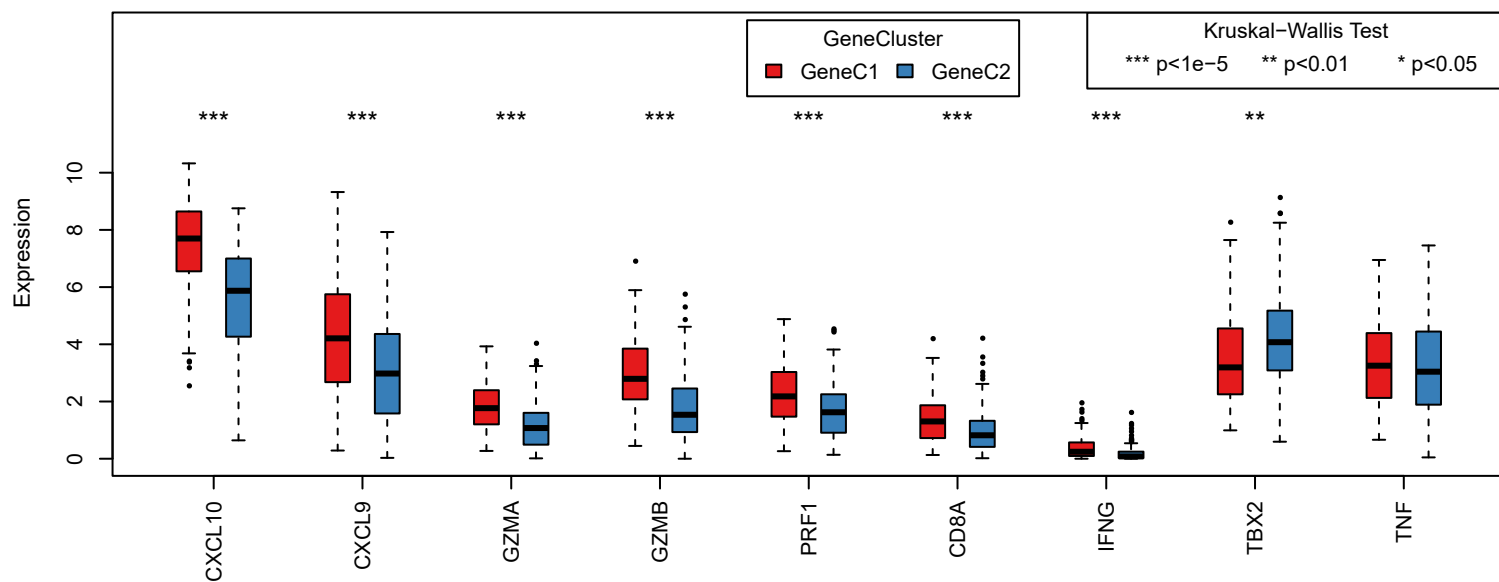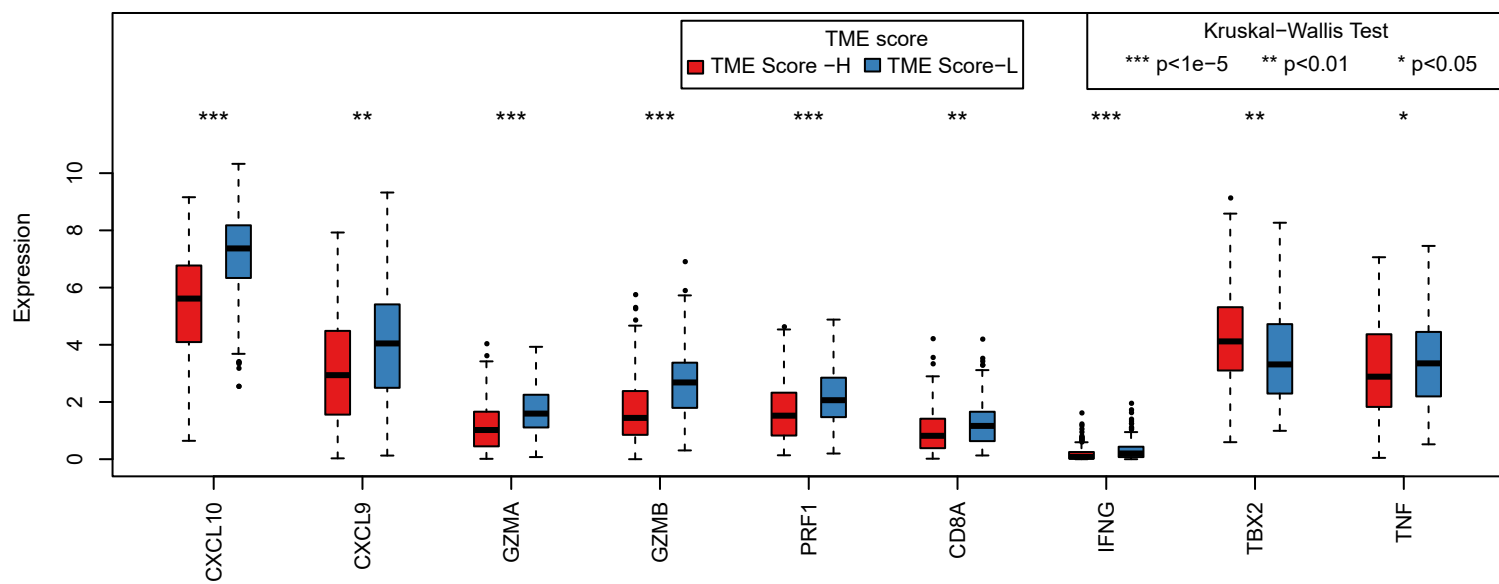

Supplement: f1 [file 7745675.f1.zip]

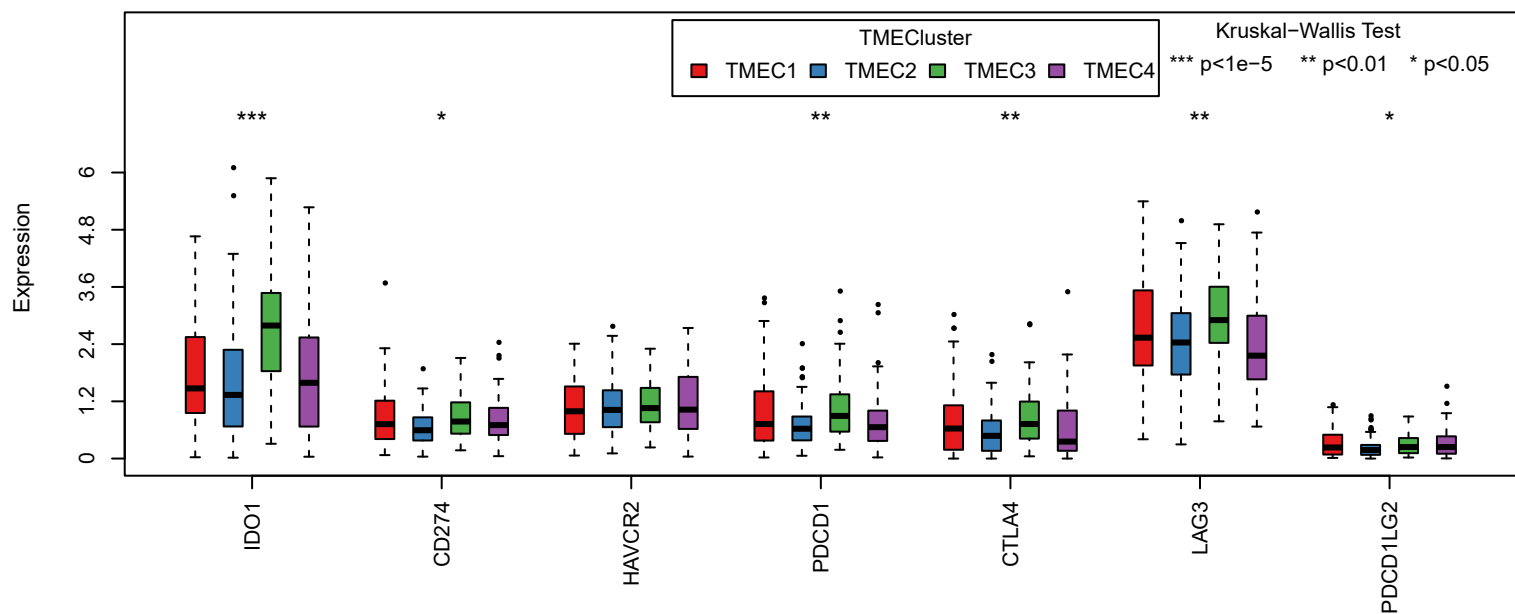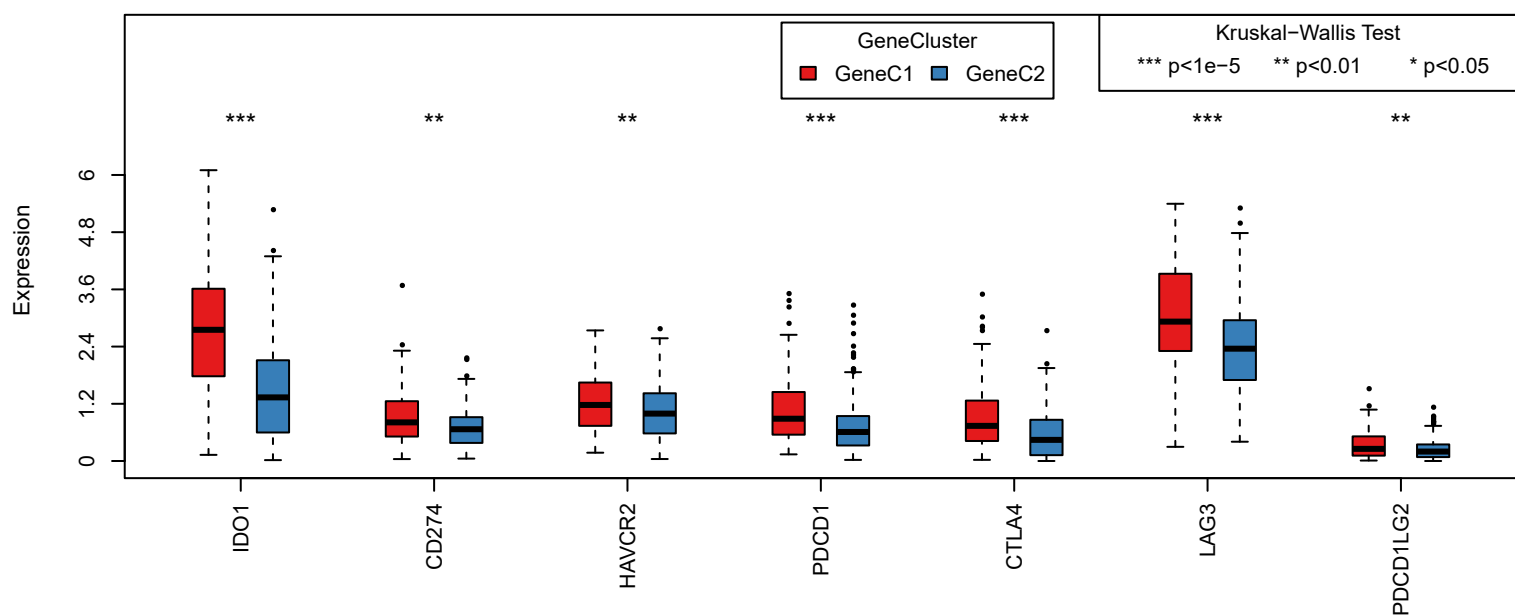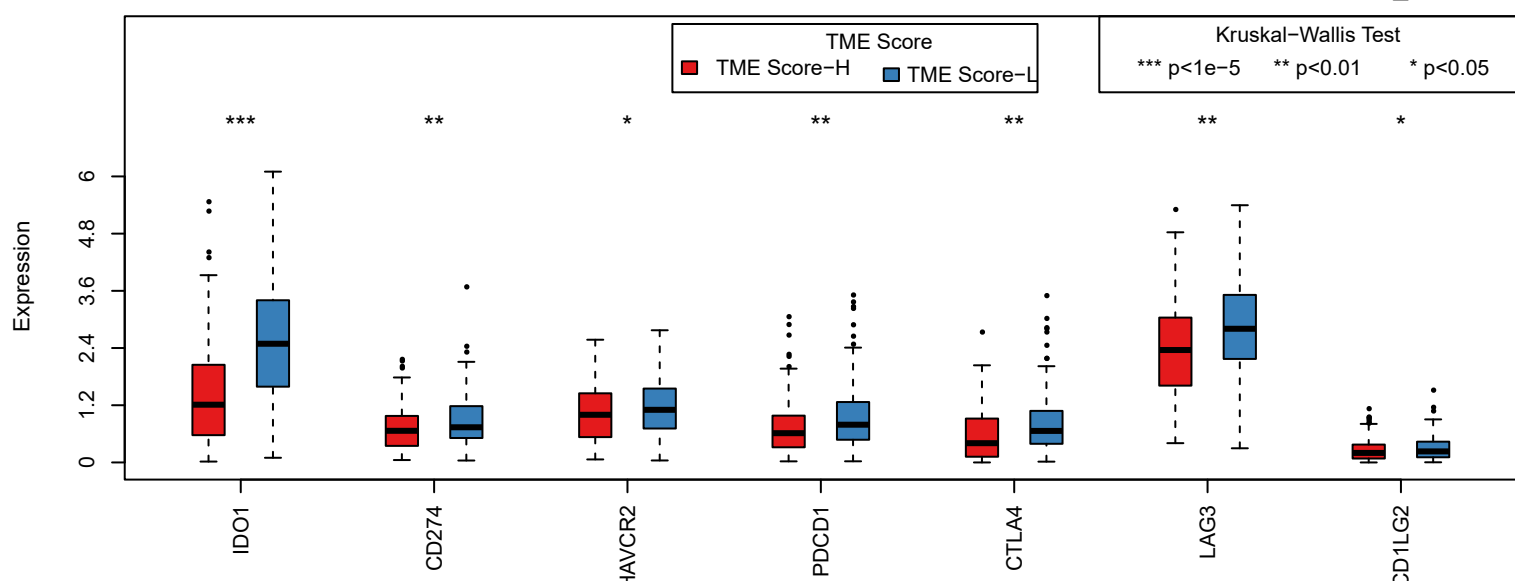

Supplement: f1 [file 7745675.f1.zip]

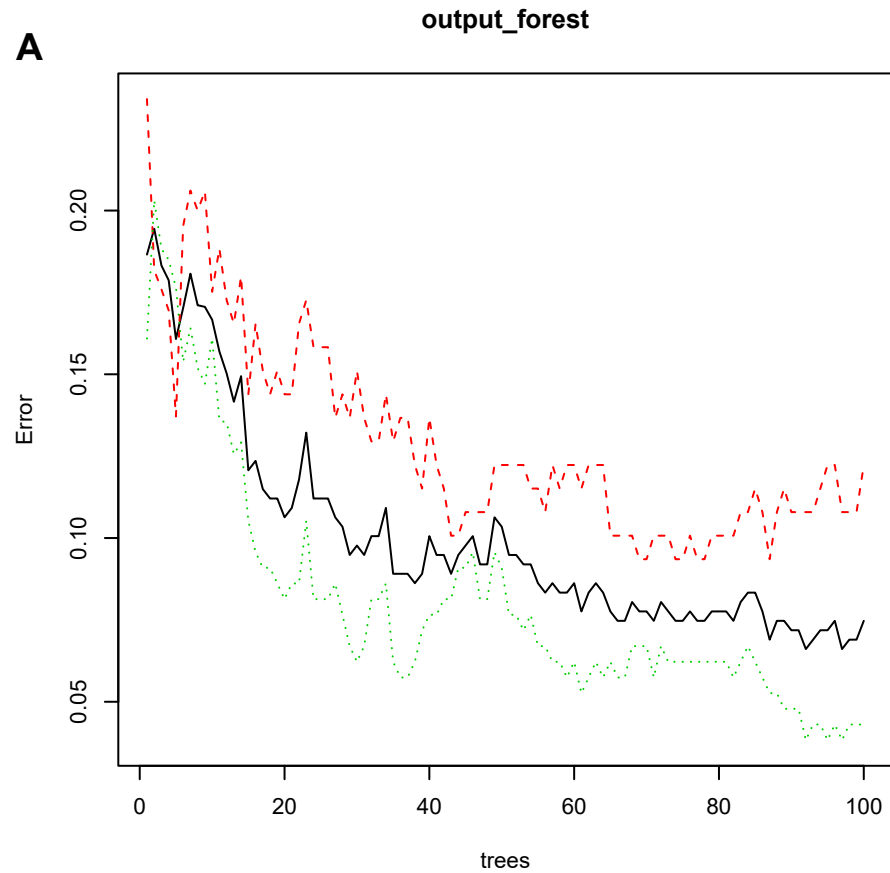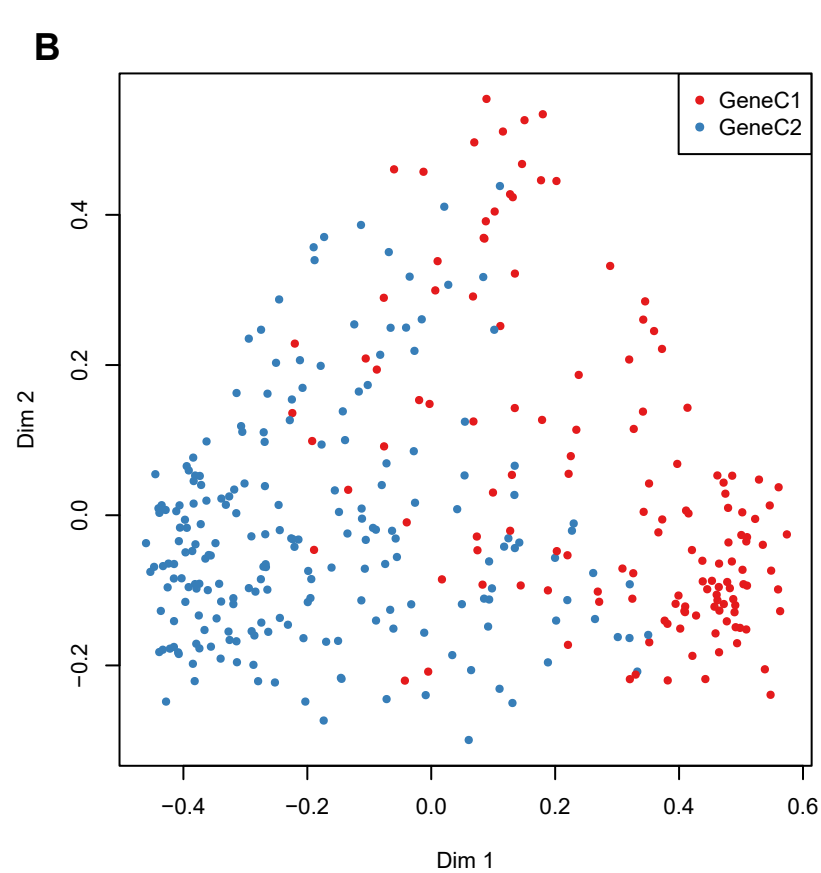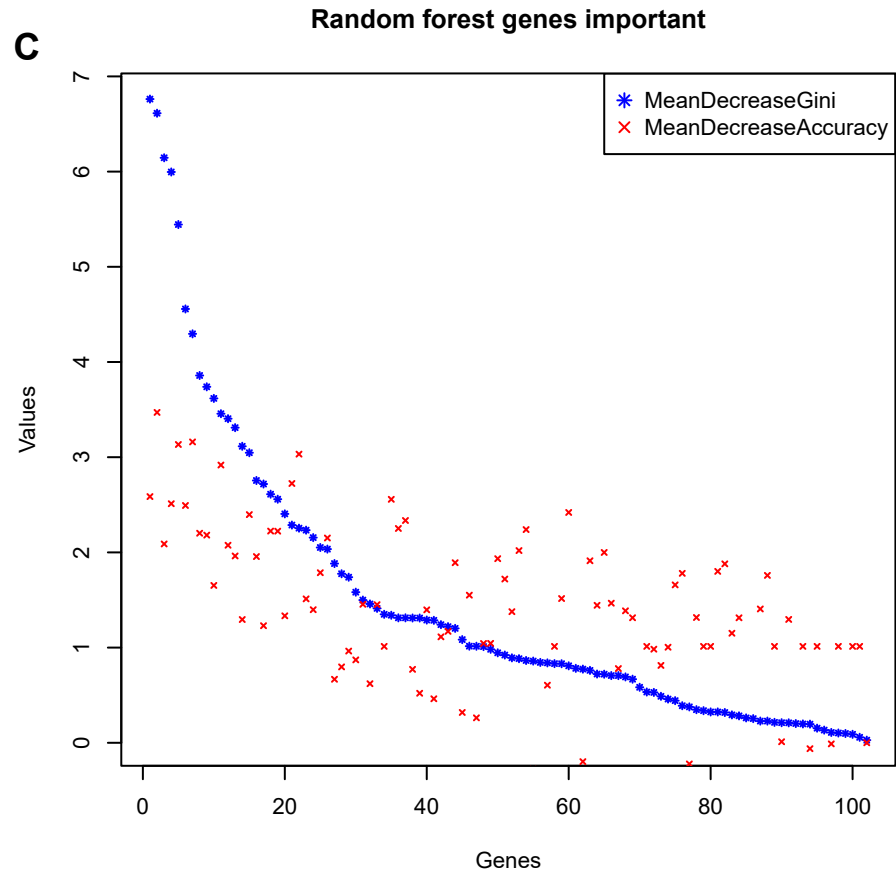

Supplement: f1 [file 7745675.f1.zip]

**A**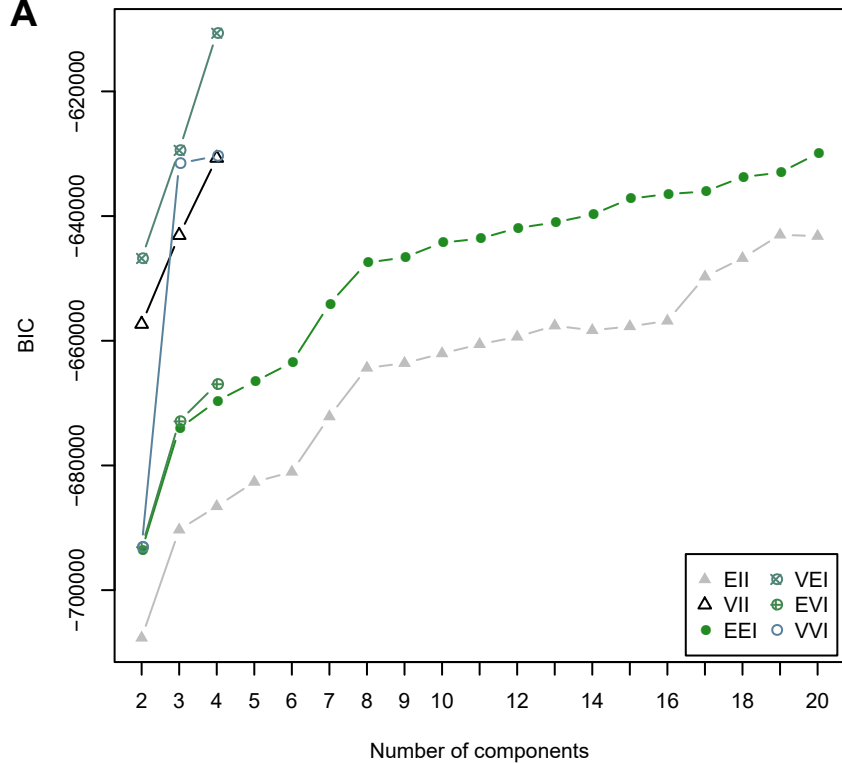**B**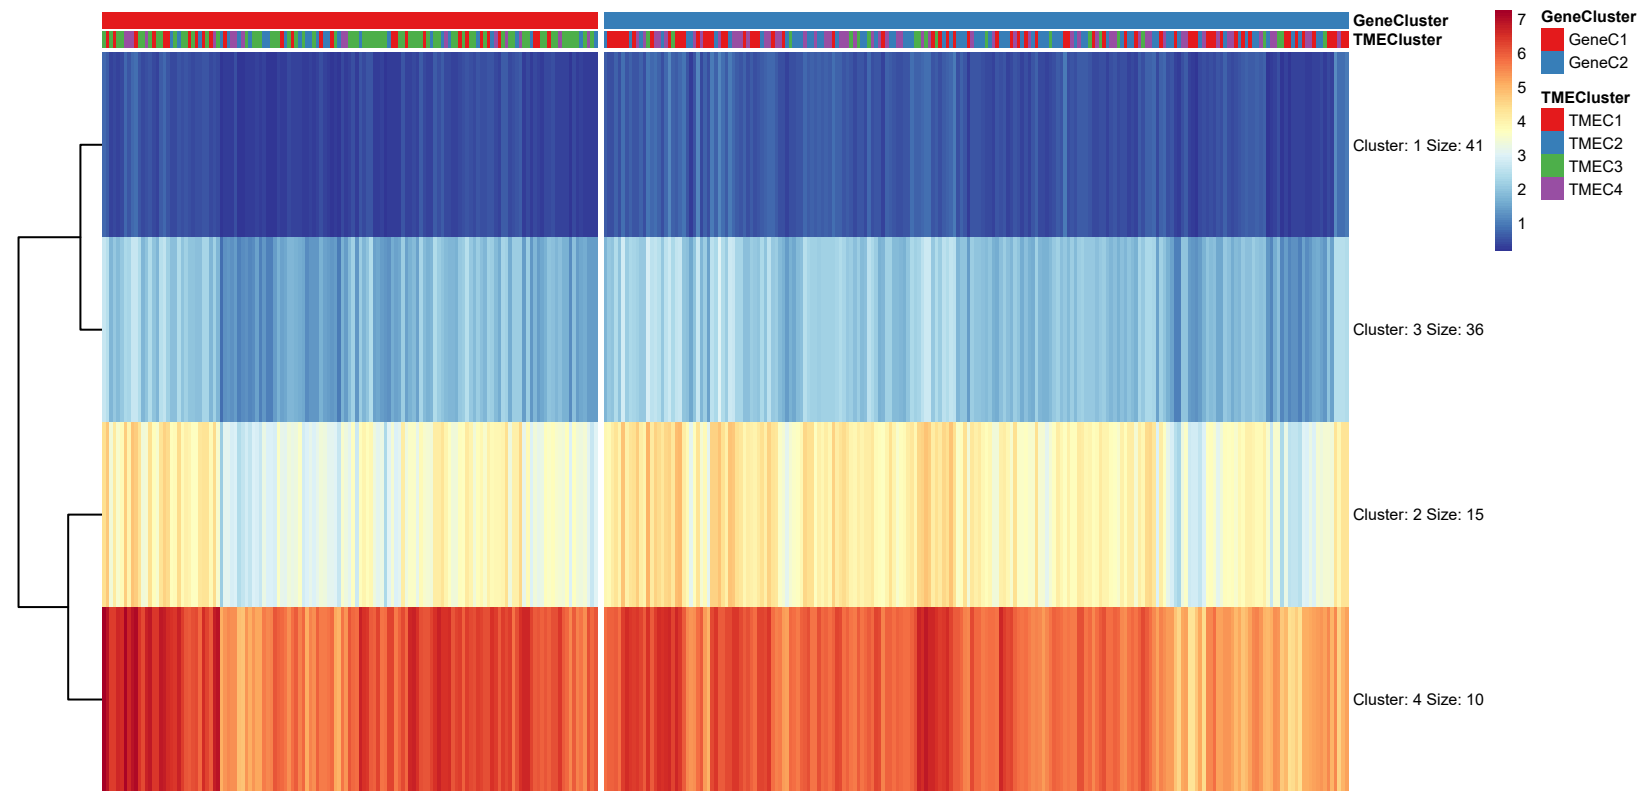

Supplement: f1 [file 7745675.f1.zip]
